# Supplementary material
Source: Royal Society of Chemistry journal article supplement (doi:10.1039/d5ma01372k)
Supplement: d5ma01372k1.pdf [file d5ma01372k1.pdf]

1

## Supporting information

2 **Hyaluronic acid-modified Se@PDA@CDDP nanoplatform for synergistic chemo-**  
3 **photothermal therapy and immune activation via redox modulation**

4

5 Yong Huang<sup>† a</sup>, Hong Hong<sup>† a</sup>, Lan Xia<sup>a</sup>, Lifang Huang<sup>a</sup>, Chuqi Shao<sup>a</sup>, Manli Qu<sup>a</sup>,  
6 Wenjun He<sup>a</sup>, Suqiong Liang<sup>a</sup>, Cunchuan Wang<sup>\*b</sup>, Yanping Qiu<sup>\*c</sup>

7

8 <sup>a</sup>The Sixth Affiliated Hospital of Jinan University (Dongguan Eastern Central  
9 Hospital), Dongguan, Guangdong, 523573, China.

10 <sup>b</sup>The First Affiliated Hospital of Jinan University, Guangzhou, 510000, China.

11 <sup>c</sup>The Fifth Affiliated Hospital of Jinan University (Heyuan Shenhe People's Hospital),  
12 Heyuan, Guangdong, 517000, China

13

14 <sup>†</sup>These authors contributed equally to the present research.

15 \*Corresponding author: [twcc@jnu.edu.cn](mailto:twcc@jnu.edu.cn) (Cunchuan Wang), [quick504@163.com](mailto:quick504@163.com)  
16 (Yanping Qiu).

17

18

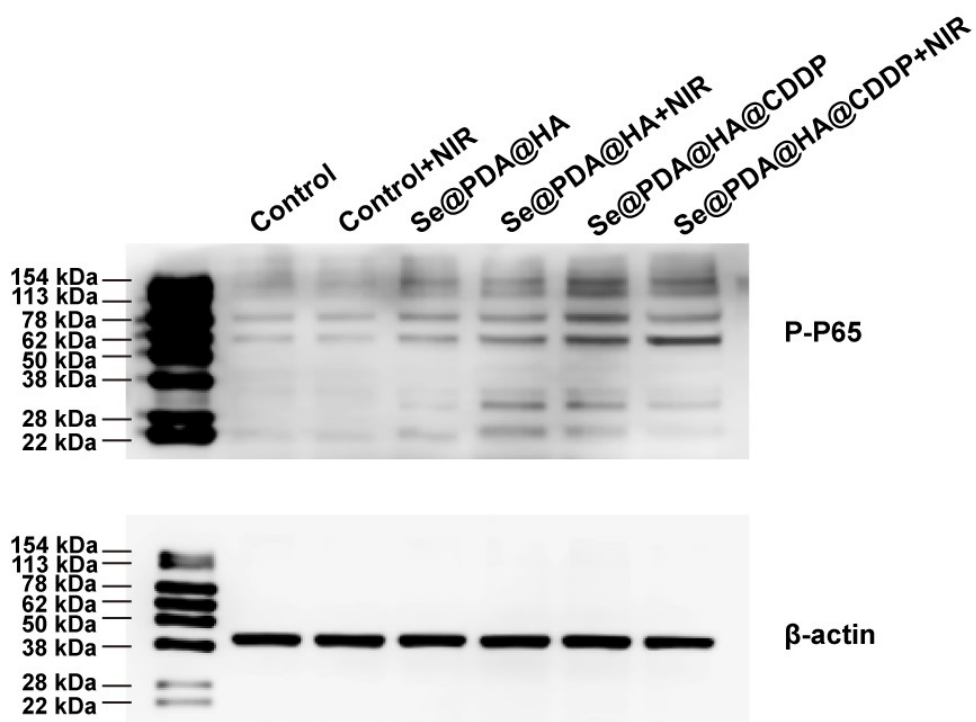

19

20 **Fig S1** Full raw Western blot data of P-P65 and  $\beta$ -actin corresponding to Figure 4. The  
 21 samples were derived from the following groups: Control, Control+NIR,  
 22 Se@PDA@HA, Se@PDA@HA+NIR, Se@PDA@HA@CDDP, and  
 23 Se@PDA@HA@CDDP + NIR. Molecular weight markers are indicated on the left,  
 24 and  $\beta$ -actin served as the loading control.
